# Supplementary material for: Multi-Tunnel Triboelectric Nanogenerator for Scavenging Mechanical Energy in Marine Floating Bodies
Source: MDPI journal article supplement (doi:10.3390/jmse10040455), 2022-03-24
Supplement: s1 [file s1]

Supplementary Information

# Multi-Tunnel Triboelectric Nanogenerator for Scavenging Mechanical Energy in Marine Floating Bodies

Ziyi Zhang <sup>1</sup>, Zhiyuan Hu <sup>1,2</sup>, Yan Wang <sup>1,3</sup>, Yawei Wang <sup>1</sup>, Qiqi Zhang <sup>1</sup>, Dehua Liu <sup>1</sup>, Hao Wang <sup>1,\*</sup>, Minyi Xu <sup>1,\*</sup>

<sup>1</sup> Dalian Key Laboratory of Marine Micro/Nano Energy and Self powered Systems, Marine Engineering College, Dalian Maritime University, Dalian, 116026, China; scarletziy@dlmu.edu.cn (Z.Z.); wangyawei@dlmu.edu.cn (Y.W.); qiqizhang@dlmu.edu.cn (Q.Z.); dh1098@dlmu.edu.cn (D.L.); hao8901@dlmu.edu.cn (H.W.)

<sup>2</sup> National Key Laboratory of Science and Technology on Micro/Nano Fabrication, Shanghai Jiao Tong University, Shanghai, 200240, China; zhiyuanhu@dlmu.edu.cn (Z.H.)

<sup>3</sup> Department of Electrical and Computer Engineering, National University of Singapore, 4 Engineering Drive 3, Singapore 117576, Singapore; e0701746@u.nus.edu (Y.W.)

\* Correspondence: xuminyi@dlmu.edu.cn

**Table S1.** Some wave energy harvesting TENGs comparison

| Wave Energy Harvesting TENGs                       | Output                                  | Materials                          | Frequency  |
|----------------------------------------------------|-----------------------------------------|------------------------------------|------------|
| Matryoshka-inspired hierarchically structured TENG | 1.64 $\mu$ A<br>1.108 W/m <sup>3</sup>  | PTFE ball<br>Copper film           | 1.25–3 Hz  |
| Duck-shape TENG                                    | 65.5 $\mu$ A<br>9.56 W/m <sup>3</sup>   | Nylon ball<br>Kapton film          | 0.56–5 Hz  |
| Sandwich-like TENG                                 | 11.94 $\mu$ A<br>36.68 W/m <sup>3</sup> | PTFE ball<br>Al film               | 0.4–2 Hz   |
| Tower-like TENG                                    | 1.4 $\mu$ A<br>1.03 W/m <sup>3</sup>    | PTFE ball<br>Nylon and copper film | 0.6–2.4 Hz |
| Multi-tunnel structure TENG                        | 4.1 $\mu$ A<br>8.3 W/m <sup>3</sup>     | PTFE ball<br>Copper film           | 0.4–2 Hz   |

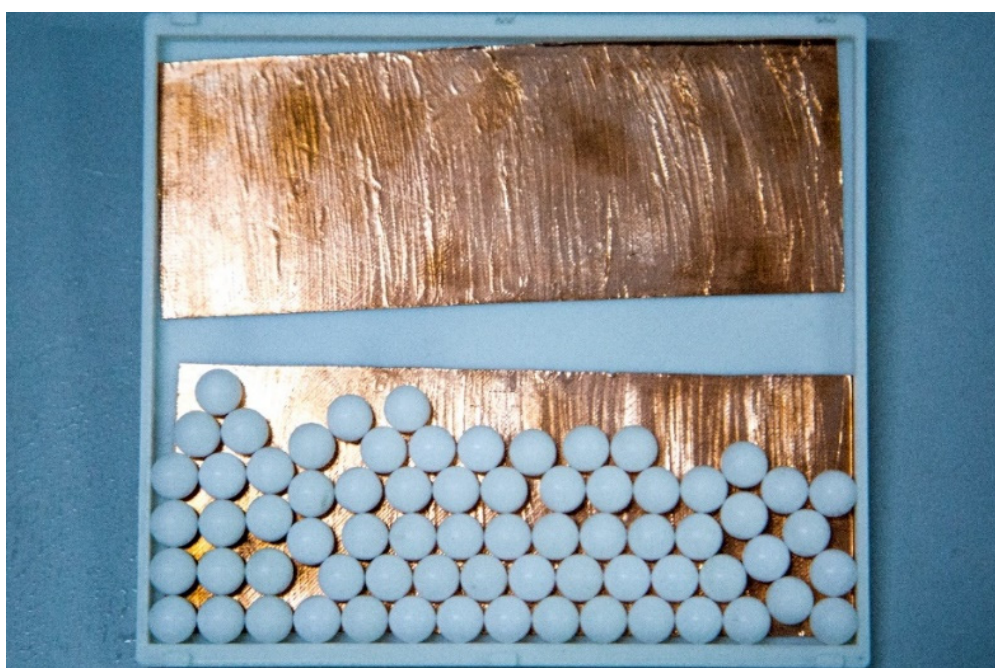

**Figure S1.** Photograph of the flat type TENG.

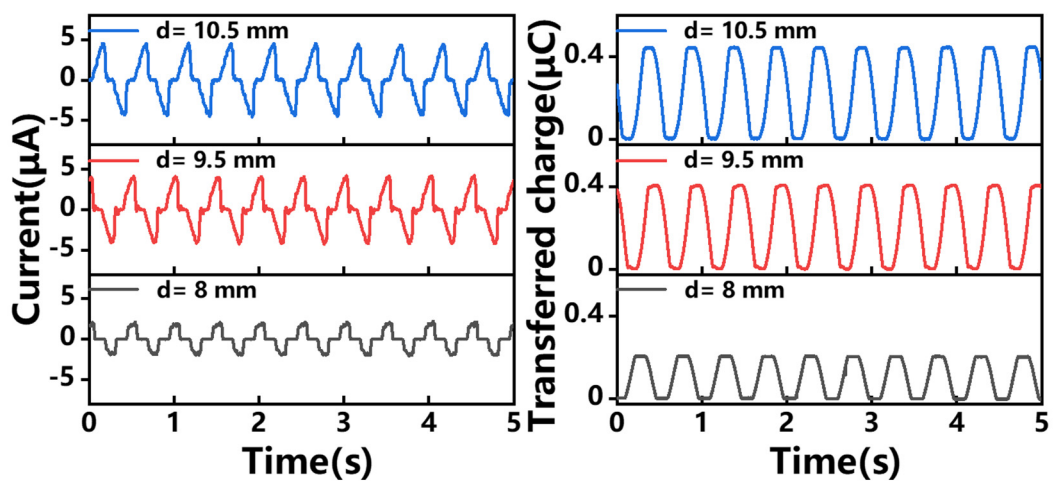

Figure S2. Detailed outputs of the MT-TENG for PTFE balls with various diameter.

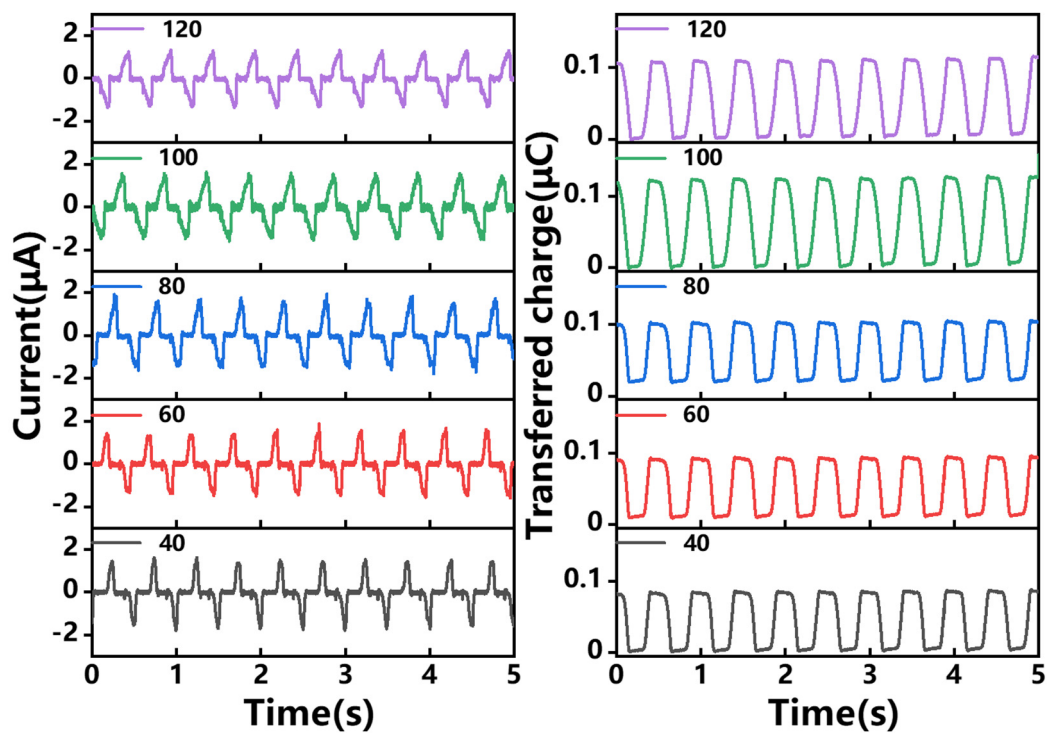

Figure S3. Detailed outputs of the flat type TENG with 40, 60, 80, 100, 120 balls.

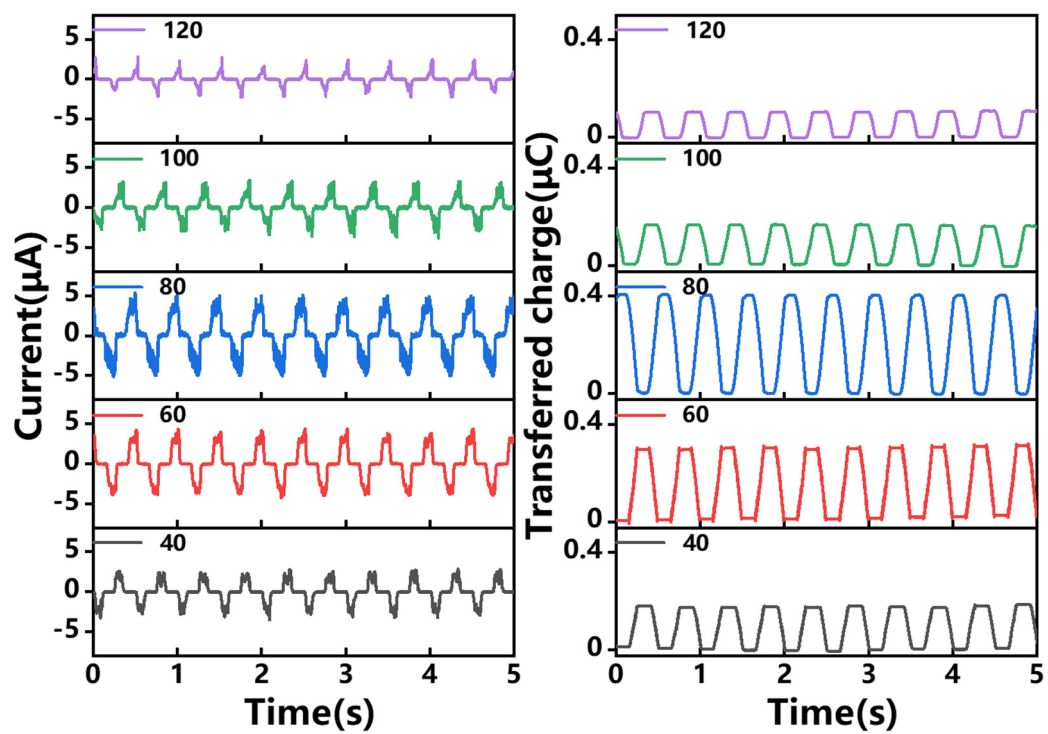

Figure S4. Detailed outputs of the MT-TENG with 40, 60, 80, 100, 120 balls.

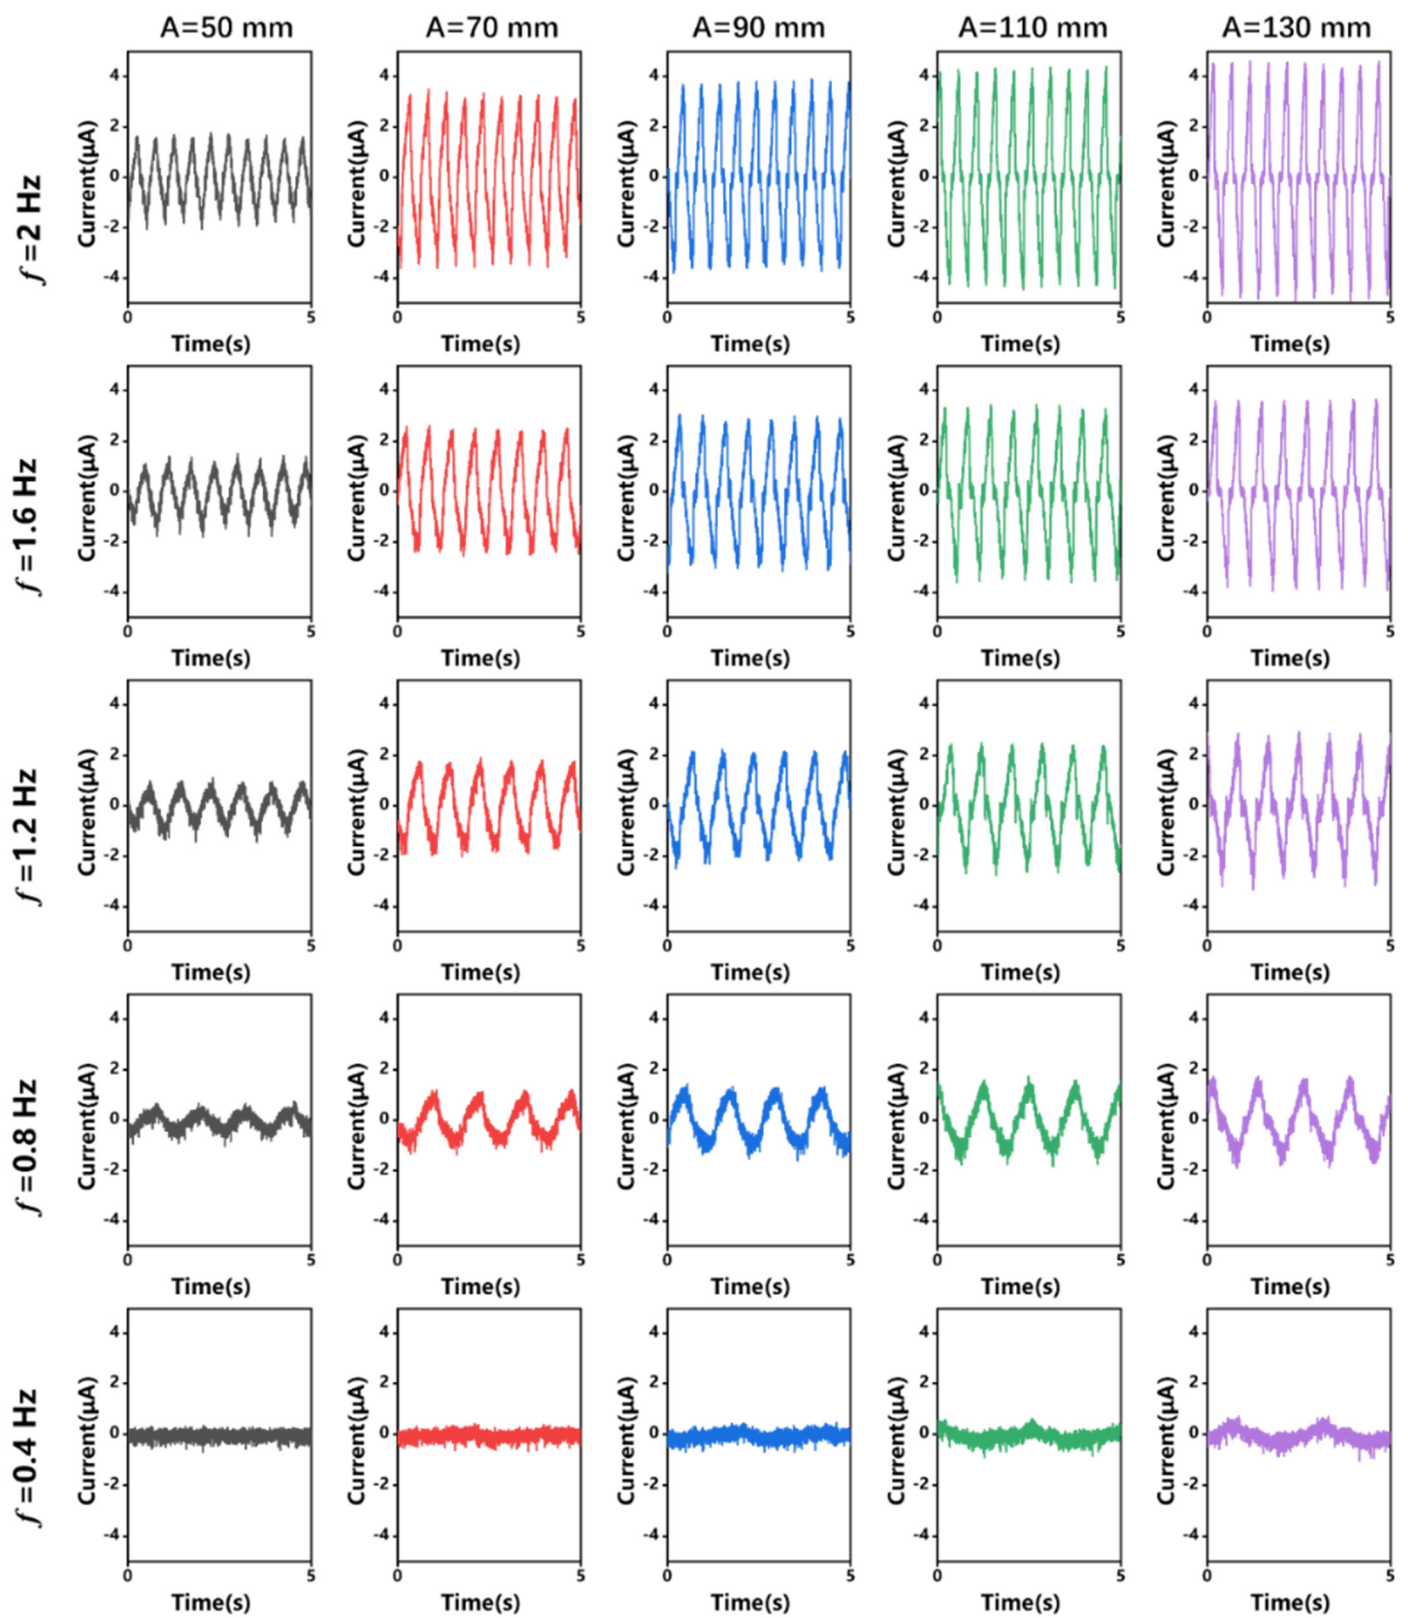

Figure S5. Details of short-circuit current with various frequency and amplitude.



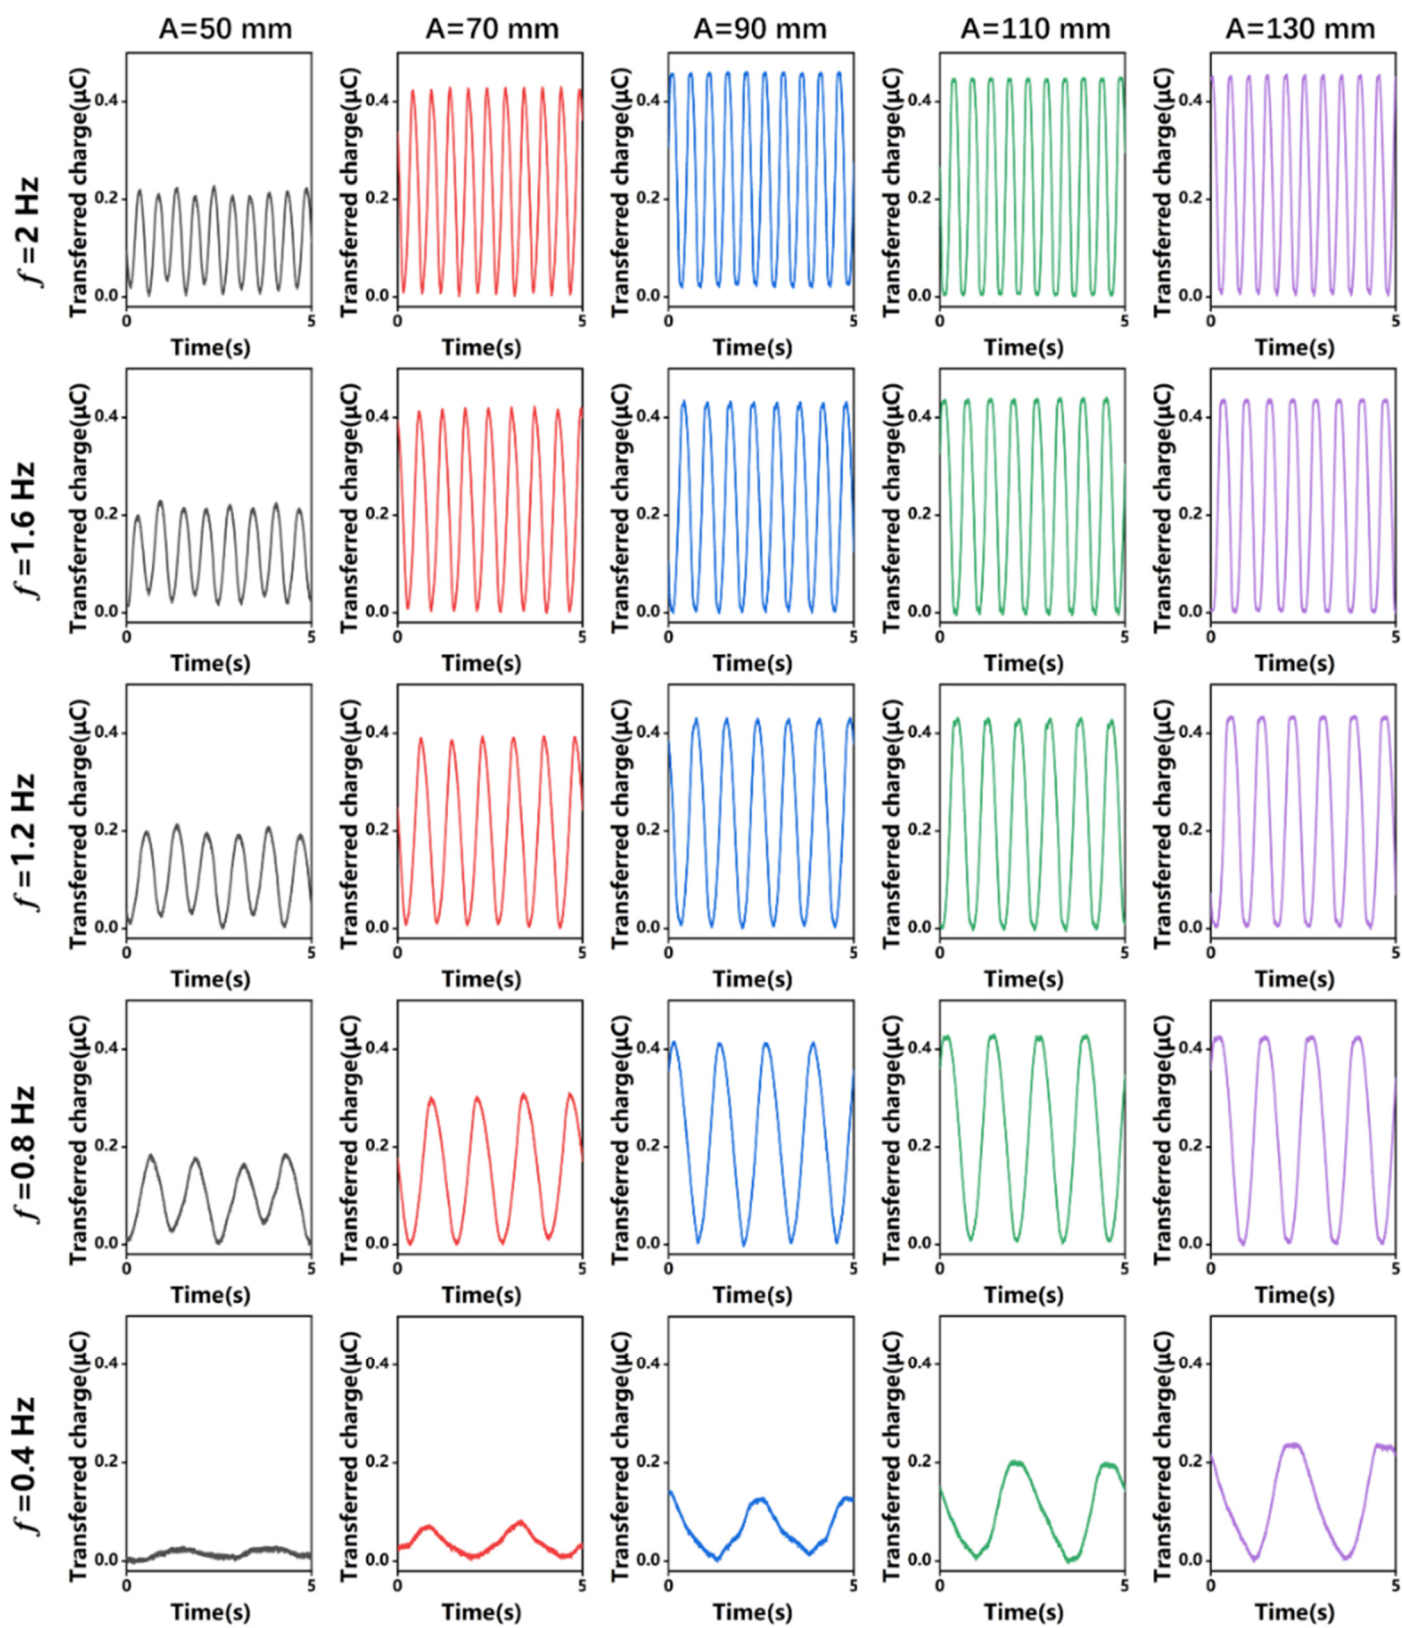

Figure S6. Details of transferred charge with various frequency and amplitude.

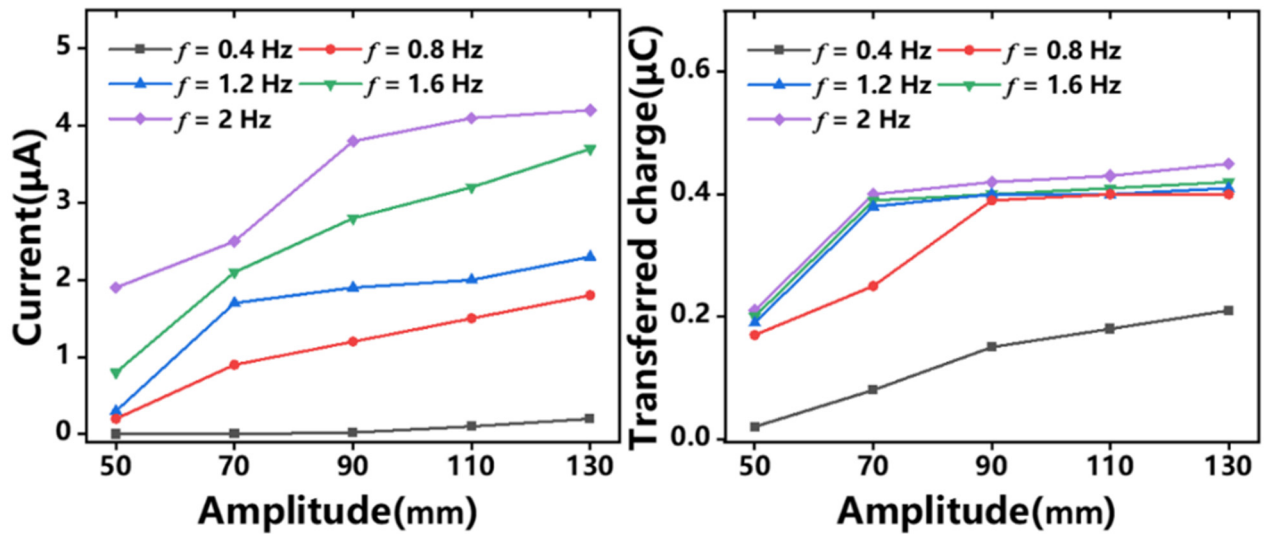

Figure S7. Details of transferred charge with various frequency and amplitude.

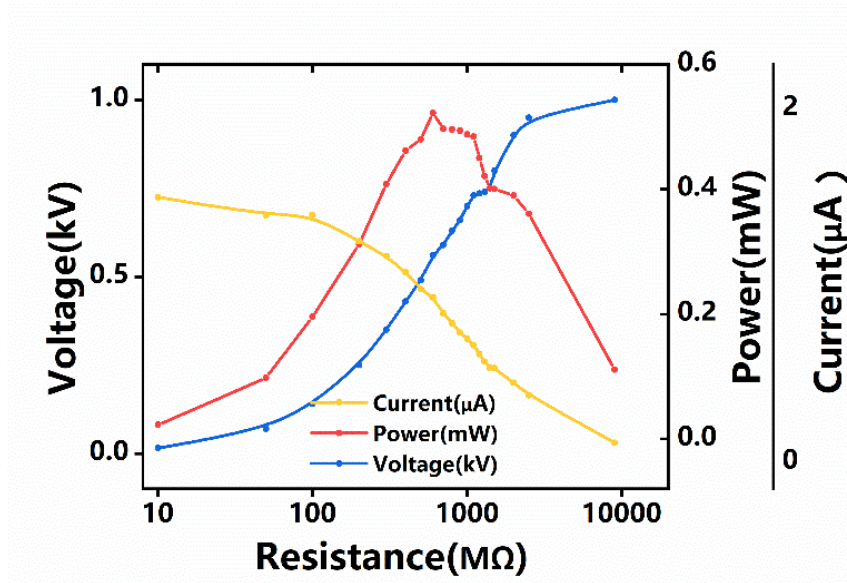

Figure S8. The output voltage, current and output power for the flat type TENG on the resistance of the load

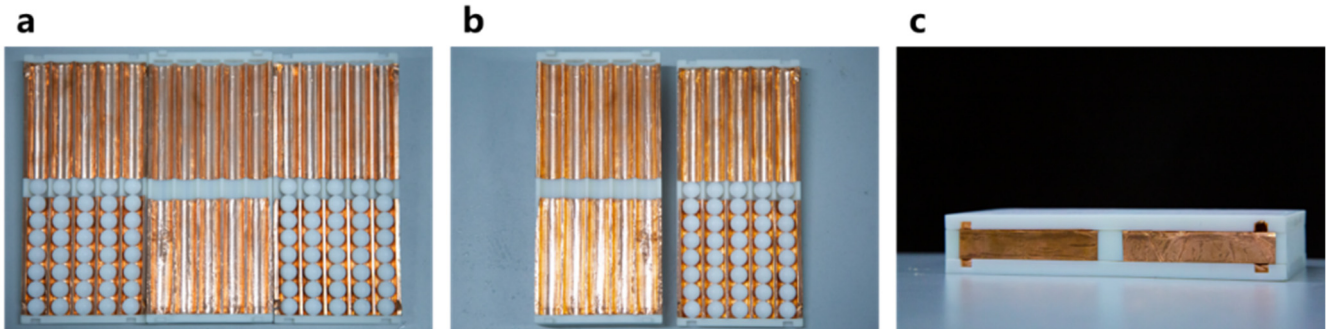

Figure S9. Photographs of the folding structure of the MT-TENG (a) Two cover plates and intermediate frame. (b) Intermediate frame combined with one cover plate. (c) Intermediate frame combined with two cover plates.
